# Supplementary material
Source: PubMed Central journal article supplement (PMC3579503)
Supplement: NIHMS393636-supplement-1.pdf [file NIHMS393636-supplement-1.pdf]

## Supplemental Figure 1

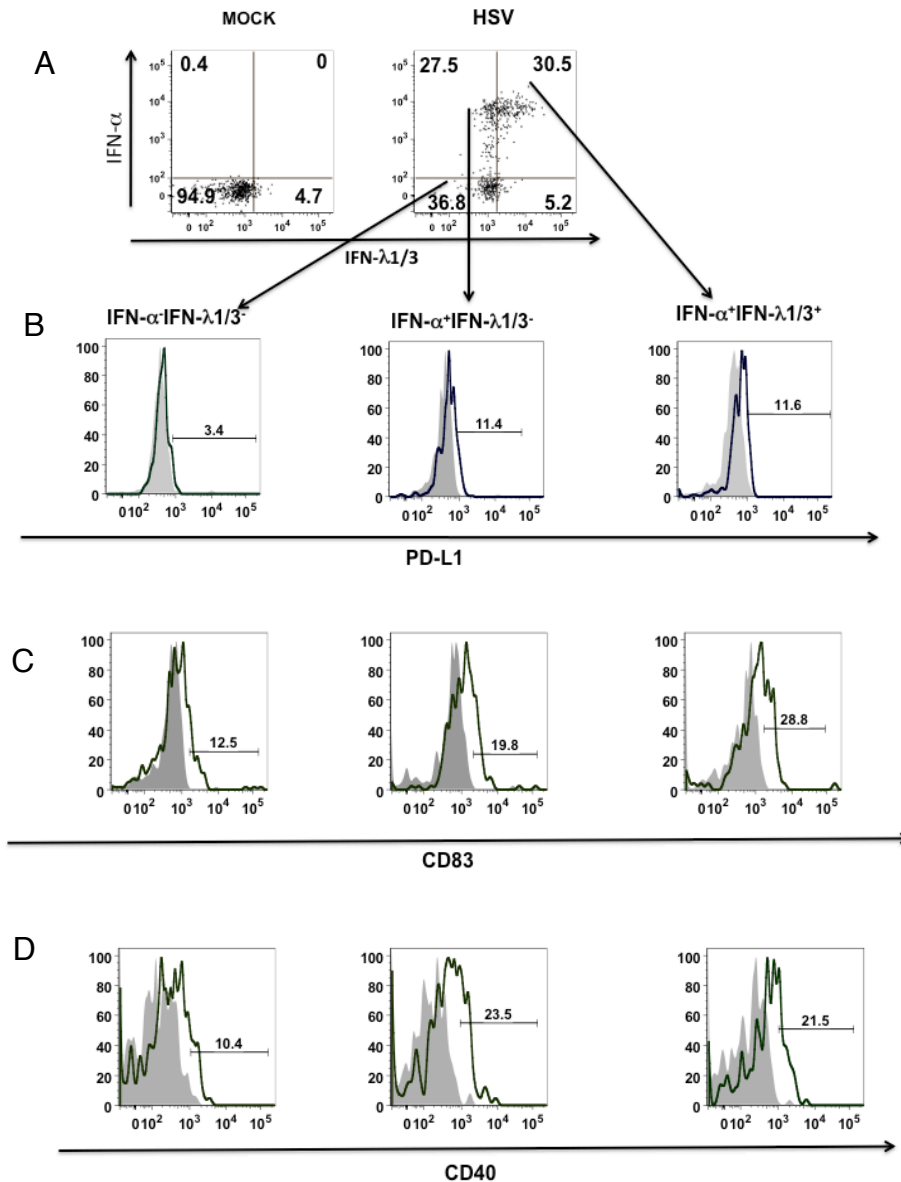

**Figure 1.** PBMC were stimulated with or without HSV-1 (MOI=1). After 7hr stimulation, the maturation phenotype of pDC in the IFN-α<sup>+</sup> IFN-λ1/3<sup>+</sup> double positive, double negative and IFN-α<sup>+</sup> IFN-λ1/3<sup>-</sup> single positive cells was examined by flow analysis. (A) Gating strategy for double positive pDC for both IFN-α<sup>+</sup> IFN-λ1/3<sup>+</sup> producing cells and other subpopulations. Expression of PD-L1 (B), CD83 (C) and CD40 (D) is shown for double negative (IFN-α<sup>-</sup> IFN-λ1/3<sup>-</sup>), single positive (IFN-α<sup>+</sup> IFN-λ1/3<sup>-</sup>) and double positive (IFN-α<sup>+</sup> IFN-λ1/3<sup>+</sup>) pDC. Histogram overlays comparing isotype control (filled) and each marker (line). Data are representative of two independent experiments.

## Supplemental Figure 2

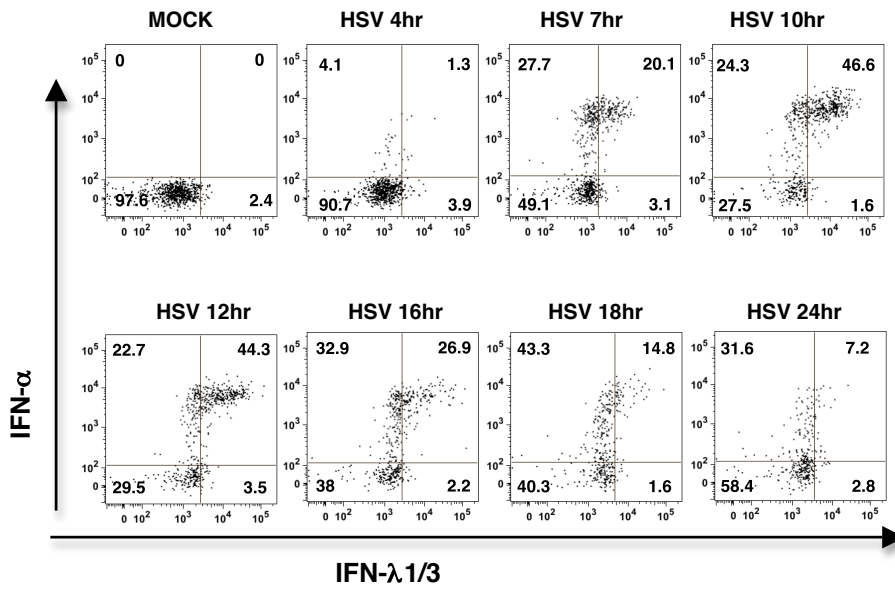

**Figure 2.** PBMC were stimulated with HSV at MOI=1. At the time points as indicated, the cells were collected and immediately surface stained with CD123-APC and BDCA2-FITC to identify the pDC population, then followed with intracellular staining for the detection of both IFN- $\alpha$  and IFN- $\lambda$ 1/3 as described. Data are representative of two independent experiments.
